# Supplementary material for: Carbon metabolism and biogeography of candidate phylum “Candidatus Bipolaricaulota” in geothermal environments of Biga Peninsula, Turkey
Source: Front Microbiol. 2023 Feb 22;14:1063139. doi: 10.3389/fmicb.2023.1063139 (PMC9992828; doi:10.3389/fmicb.2023.1063139)
Supplement: Supplementary file 6 [file Table_4.XLSX]

## Sheet: MAGs summary
bins	total_length	num_contigs	N50	GC_content	percent_completion	percent_redundancy	t_domain	t_phylum	t_class	t_order	t_family	t_genus	t_species
Ca. Bipolaricaulota CK101	1715316	119	21351	56.35	90.14	0.00	Bacteria	Bipolaricaulota
Ca. Bipolaricaulota CK84	1043573	499	2221	56.02	83.10	4.23	Bacteria	Bipolaricaulota
Ca. Bipolaricaulota HID15	1156546	53	34178	60.43	90.14	0.00	Bacteria	Bipolaricaulota	Bipolaricaulia	Bipolaricaulales	Bipolaricaulaceae	UBA3571	UBA3571 sp002375995
Ca. Bipolaricaulota TUZ33	1626404	100	31943	64.72	91.55	2.82	Bacteria	Bipolaricaulota
AG1_sp_HID134	1268350	244	5559	44.77	75.00	1.32	Archaea	Thermoproteota	Thermoproteia	Desulfurococcales	AG1	AG1	AG1 sp003116855
Archaeoglobaceae_HID16	1358052	46	56426	36.49	97.37	1.32	Archaea	Halobacteriota	Archaeoglobi	Archaeoglobales	Archaeoglobaceae
Archaeoglobus_sp_KST_TUZ	1779401	71	37612	36.87	94.74	2.63	Archaea	Halobacteriota	Archaeoglobi	Archaeoglobales	Archaeoglobaceae	Archaeoglobus	Archaeoglobus sp002010195
Archaeoglobus_sp_TUZ_KST11	1625430	70	30964	42.67	94.74	0.00	Archaea	Halobacteriota	Archaeoglobi	Archaeoglobales	Archaeoglobaceae	Archaeoglobus	Archaeoglobus sp002507545
Ardenticatena_maritima_TUZ2	1004650	491	2102	57.11	43.66	0.00	Bacteria	Chloroflexota	Anaerolineae	Ardenticatenales	Ardenticatenaceae	Ardenticatena	Ardenticatena maritima
B63_sp_HID133	1792706	85	33030	42.15	90.79	3.95	Archaea	Thermoproteota	Bathyarchaeia	B26-1	B26-1	B63
B73-G16_sp_HID112	1230426	514	2702	46.38	71.83	7.04	Bacteria	Desulfobacterota	BSN033	B13-G15	B13-G15	B73-G16	B73-G16 sp003646585
BMS3ABIN06_sp_ENTUR	2327858	268	10695	51.75	78.87	4.23	Bacteria	Nitrospirota	Thermodesulfovibrionia	UBA6902	UBA6902	BMS3ABIN06	BMS3ABIN06 sp002897895
Bacteroidia_CK103	2307563	965	2721	37.18	81.69	8.45	Bacteria	Bacteroidota	Bacteroidia
Bellilinea_sp_GURE3	2792654	1265	2512	53.46	87.32	4.23	Bacteria	Chloroflexota	Anaerolineae	Anaerolineales	Anaerolineaceae	Bellilinea	Bellilinea sp003448875
Burkholderiales_CK29	2576370	236	18126	65.65	100.00	7.04	Bacteria	Proteobacteria	Gammaproteobacteria	Burkholderiales
Burkholderiales_GURE21	3194907	580	7806	65.60	92.96	4.23	Bacteria	Proteobacteria	Gammaproteobacteria	Burkholderiales
Caldarchaeum_subterraneum_HID5	1556194	12	346562	51.73	93.42	2.63	Archaea	Thermoproteota	Nitrososphaeria	Caldarchaeales	Caldarchaeaceae	Caldarchaeum	Caldarchaeum subterraneum
Caldimicrobium_sp_HID99	1330320	686	1977	45.56	74.65	7.04	Bacteria	Desulfobacterota	Thermodesulfobacteria	Thermodesulfobacteriales	Thermodesulfobacteriaceae	Caldimicrobium	Caldimicrobium sp002441555
Chloroflexus_aurantiacus_CK9	4777522	251	29934	56.88	94.37	4.23	Bacteria	Chloroflexota	Chloroflexia	Chloroflexales	Chloroflexaceae	Chloroflexus	Chloroflexus aurantiacus
Chloroflexus_sp_NEB1	4085746	300	19087	56.31	91.55	2.82	Bacteria	Chloroflexota	Chloroflexia	Chloroflexales	Chloroflexaceae	Chloroflexus
Chlorogloeopsis_sp_CK12	4909542	31	233720	42.51	98.59	5.63	Bacteria	Cyanobacteria	Cyanobacteriia	Cyanobacteriales	Nostocaceae	Chlorogloeopsis	Chlorogloeopsis sp000332255
Cyclobacteriaceae_CK80	2925731	16	274659	47.90	97.18	0.00	Bacteria	Bacteroidota	Bacteroidia	Cytophagales	Cyclobacteriaceae
Desulfurococcaceae_HID21	1252281	29	164405	38.76	94.74	1.32	Archaea	Thermoproteota	Thermoproteia	Desulfurococcales	Desulfurococcaceae
ELB16-189_sp_CAN1	4263486	46	127800	49.82	97.18	0.00	Bacteria	Bacteroidota	Bacteroidia	Cytophagales	Cyclobacteriaceae	ELB16-189
Fischerella_thermalis_IVR1	6314696	497	22874	41.07	98.59	5.63	Bacteria	Cyanobacteria	Cyanobacteriia	Cyanobacteriales	Nostocaceae	Fischerella	Fischerella thermalis
Fontimonas_thermophila	751676	9	215487	63.99	29.58	0.00	Bacteria	Proteobacteria	Gammaproteobacteria	Nevskiales	Nevskiaceae	Fontimonas	Fontimonas thermophila
Fontimonas_thermophila_CK2	1921569	17	356240	65.94	66.20	0.00	Bacteria	Proteobacteria	Gammaproteobacteria	Nevskiales	Nevskiaceae	Fontimonas	Fontimonas thermophila
G233_sp_CK24	1763550	997	1818	69.99	76.06	9.86	Bacteria	Chloroflexota	Dehalococcoidia	UBA2991	UBA2991	G233	G233 sp002563855
GBS-DC_sp_CK98	3178920	446	11557	57.30	95.77	8.45	Bacteria	Armatimonadota	Fimbriimonadia	OS-L	GBS-DC	GBS-DC	GBS-DC sp001442985
GBS-DC_sp_HID6	1514977	217	8029	57.26	81.69	0.00	Bacteria	Armatimonadota	Fimbriimonadia	OS-L	GBS-DC	GBS-DC	GBS-DC sp001442985
GCA-2687515_sp_NEB2	1373287	827	1632	69.32	42.25	0.00	Bacteria	Proteobacteria	Alphaproteobacteria	Rhodospirillales	UBA2165	GCA-2687515	GCA-2687515 sp002687515
GJ_E10_sp900290295	144855	4	119379	67.96	39.44	0.00	Bacteria	Proteobacteria	Gammaproteobacteria	Burkholderiales	Burkholderiaceae	GJ-E10	GJ-E10 sp900290295
G_28-57-27_sp_GURE5	1554651	895	1735	64.68	76.06	8.45	Bacteria	Proteobacteria	Gammaproteobacteria	Halothiobacillales	Halothiobacillaceae	28-57-27	28-57-27 sp006212015
Gallionellaceae_IVR2	2344347	185	34549	61.75	98.59	1.41	Bacteria	Proteobacteria	Gammaproteobacteria	Burkholderiales	Gallionellaceae
HRBIN02_sp_HID11	1490600	8	496467	52.44	96.05	0.00	Archaea	Thermoproteota	Nitrososphaeria	Caldarchaeales	HR02	HRBIN02	HRBIN02 sp002898395
HRBIN17_sp_HID43	3105054	233	18754	54.53	97.18	0.00	Bacteria	Armatimonadota	HRBIN17	HRBIN17	HRBIN17	HRBIN17	HRBIN17 sp002898575
HRBIN29_sp_TUZ_KST38	1491318	806	1970	69.64	83.10	4.23	Bacteria	Chloroflexota	Dehalococcoidia	UBA2991	UBA2991	HRBIN29	HRBIN29 sp002898215
HRBIN37_sp_TUZ1	1692532	308	6107	42.10	88.73	2.82	Bacteria	Desulfobacterota	UBA1144	UBA2774	CSP1-2	HRBIN37	HRBIN37 sp002898375
HRBIN39_sp_KST3	2456505	366	7908	72.54	90.14	8.45	Bacteria	Proteobacteria	Alphaproteobacteria	Geminicoccales	Geminicoccaceae	HRBIN39	HRBIN39 sp002898955
HRBIN40_sp_KST7	3085782	65	114304	67.74	100.00	0.00	Bacteria	Proteobacteria	Alphaproteobacteria	Geminicoccales	Geminicoccaceae	HRBIN40	HRBIN40 sp002898275
Hydrogenobacter_thermophilus_HID30	1326324	160	10184	39.50	91.55	2.82	Bacteria	Aquificota	Aquificae	Aquificales	Aquificaceae	Hydrogenobacter	Hydrogenobacter thermophilus
Hydrogenophilus_thermoluteolus_CK7	3003223	431	23039	60.62	91.55	4.23	Bacteria	Proteobacteria	Gammaproteobacteria	Burkholderiales	Hydrogenophilaceae	Hydrogenophilus	Hydrogenophilus thermoluteolus
Hydrothermus_pacificus_TUZ12	718847	79	24614	32.95	49.30	4.23	Bacteria	WOR-3	Hydrothermia	Hydrothermales	Hydrothermaceae	Hydrothermus	Hydrothermus pacificus
JDFR-14_sp_TUZ19	1176361	305	5135	43.61	67.11	2.63	Archaea	Thermoproteota	Nitrososphaeria	Geothermarchaeales	JDFR-13	JDFR-14	JDFR-14 sp002011085
JdFR-37_sp_TUZ8	1637822	46	52770	47.54	100.00	1.32	Archaea	Halobacteriota	Archaeoglobi	Archaeoglobales	Archaeoglobaceae	JdFR-37	JdFR-37 sp002010215
JdFR-43_sp_TUZ25	973596	243	3957	45.23	64.47	1.32	Archaea	Thermoplasmatota	E2	UBA202	JdFR-43	JdFR-43	JdFR-43 sp002011355
Korarchaeum_sp_HID24	1369319	110	18200	52.90	92.11	3.95	Archaea	Thermoproteota	Korarchaeia	Korarchaeales	Korarchaeaceae	Korarchaeum	Korarchaeum sp003344655
Kryptonium_sp_HID1	2284758	66	58189	37.91	98.59	0.00	Bacteria	Bacteroidota	Kryptonia	Kryptoniales	Kryptoniaceae	Kryptonium
LSR1_sp_CK120	1126144	71	26214	62.19	81.69	0.00	Bacteria	Proteobacteria	Gammaproteobacteria	Burkholderiales	Thiobacillaceae	LSR1	LSR1 sp004337445
Lysobacter_tengchongense_sp_ENT1	850014	213	5067	69.50	56.34	1.41	Bacteria	Proteobacteria	Gammaproteobacteria	Xanthomonadales	Xanthomonadaceae	Lysobacter	Lysobacter tengchongense
Meinhardsimonia_xiamenensis_KST1	3120847	102	51767	68.06	100.00	1.41	Bacteria	Proteobacteria	Alphaproteobacteria	Rhodobacterales	Rhodobacteraceae	Meinhardsimonia	Meinhardsimonia xiamenensis
Meiothermus_cerbereus_CK14	2804479	203	18913	62.00	85.92	0.00	Bacteria	Deinococcota	Deinococci	Deinococcales	Thermaceae	Meiothermus	Meiothermus cerbereus
Meiothermus_hypogaeus_CK21	2908268	496	9566	60.98	84.51	0.00	Bacteria	Deinococcota	Deinococci	Deinococcales	Thermaceae	Meiothermus	Meiothermus hypogaeus
Meiothermus_ruber_CK4	3161334	200	27505	63.33	91.55	5.63	Bacteria	Deinococcota	Deinococci	Deinococcales	Thermaceae	Meiothermus	Meiothermus ruber
Meiothermus_sp_CK108	706529	187	5556	62.47	0.00	0.00	Bacteria	Deinococcota	Deinococci	Deinococcales	Thermaceae	Meiothermus
Meiothermus_sp_CK23	1960805	657	3840	61.79	81.69	4.23	Bacteria	Deinococcota	Deinococci	Deinococcales	Thermaceae	Meiothermus	Meiothermus cerbereus
Methylohalobius_crimeensis_NEB10	2264418	220	14749	58.18	90.14	11.27	Bacteria	Proteobacteria	Gammaproteobacteria	Methylococcales	Methylothermaceae	Methylohalobius	Methylohalobius crimeensis
Methylohalobius_crimeensis_TUZ_KEST51	2256480	108	32352	61.21	94.37	8.45	Bacteria	Proteobacteria	Gammaproteobacteria	Methylococcales	Methylothermaceae	Methylohalobius	Methylohalobius crimeensis
Micrococcus_luteus_CK11	2228088	194	17344	73.54	94.37	0.00	Bacteria	Actinobacteriota	Actinomycetia	Actinomycetales	Micrococcaceae	Micrococcus	Micrococcus luteus
Moraxella_sp_CK7	2411011	33	122229	43.91	100.00	0.00	Bacteria	Proteobacteria	Gammaproteobacteria	Pseudomonadales	Moraxellaceae	Moraxella
Nitrosocaldus_cavascurensis_HID10	1057612	418	2987	42.55	81.58	6.58	Archaea	Thermoproteota	Nitrososphaeria	Nitrososphaerales	Nitrosocaldaceae	Nitrosocaldus	Nitrosocaldus cavascurensis
PFJX01_sp_IVR4	2474906	425	8959	65.10	97.18	1.41	Bacteria	Proteobacteria	Gammaproteobacteria	Burkholderiales	Thiobacillaceae	PFJX01	PFJX01 sp002784045
Porphyrobacter_cryptus_CK5	2691270	645	5668	68.42	98.59	8.45	Bacteria	Proteobacteria	Alphaproteobacteria	Sphingomonadales	Sphingomonadaceae	Porphyrobacter	Porphyrobacter cryptus
QEVD01_sp_TUZ27	2193709	1023	2259	57.75	77.46	1.41	Bacteria	KSB1	UBA2214	CR04bin15	QEVD01	QEVD01	QEVD01 sp003576975
Rhodobacteraceae_KST5	3789995	95	74886	66.98	100.00	2.82	Bacteria	Proteobacteria	Alphaproteobacteria	Rhodobacterales	Rhodobacteraceae
Rhodothermus_sp_CK13	2966862	102	51960	57.78	98.59	1.41	Bacteria	Bacteroidota	Rhodothermia	Rhodothermales	Rhodothermaceae	Rhodothermus
SG8-39_NEB2	1709627	1051	1633	71.42	64.79	5.63	Bacteria	Proteobacteria	Gammaproteobacteria	Burkholderiales	SG8-39
SURF-21_sp_GURE9	2557618	51	84671	61.41	94.37	4.23	Bacteria	Actinobacteriota	RBG-13-55-18	RBG-13-55-18	RBG-13-55-18	SURF-21	SURF-21 sp003598015
Schleiferia_thermophila_CK8	2568817	38	142546	43.27	98.59	0.00	Bacteria	Bacteroidota	Bacteroidia	Flavobacteriales	Schleiferiaceae	Schleiferia	Schleiferia thermophila
Sediminibacterium_sp_GURE4	1561271	702	2501	40.08	59.15	0.00	Bacteria	Bacteroidota	Bacteroidia	Chitinophagales	Chitinophagaceae	Sediminibacterium
Sulfurihydrogenibium_azorense_CK17	1591738	136	18555	32.26	95.77	1.41	Bacteria	Aquificota	Aquificae	Hydrogenothermales	Hydrogenothermaceae	Sulfurihydrogenibium	Sulfurihydrogenibium azorense
Tepidimonas_ignava_CK19	330835	17	28035	67.96	43.66	0.00	Bacteria	Proteobacteria	Gammaproteobacteria	Burkholderiales	Burkholderiaceae	Tepidimonas	Tepidimonas ignava
Tepidimonas_ignava_CK22	1813843	69	41332	69.38	42.25	5.63	Bacteria	Proteobacteria	Gammaproteobacteria	Burkholderiales	Burkholderiaceae	Tepidimonas	Tepidimonas ignava
Tepidimonas_sp_CK10	1634774	52	47611	68.08	80.28	2.82	Bacteria	Proteobacteria	Gammaproteobacteria	Burkholderiales	Burkholderiaceae	Tepidimonas
Tepidimonas_sp_CK20	482866	123	5684	67.50	0.00	0.00	Bacteria	Proteobacteria	Gammaproteobacteria	Burkholderiales	Burkholderiaceae	Tepidimonas
Thermanaeromonas_toyohensis_sp_GURE5	2349971	664	4612	51.09	88.73	2.82	Bacteria	Firmicutes	Moorellia	Moorellales	Moorellaceae	Thermanaeromonas	Thermanaeromonas toyohensis
Thermococcus_sp_TUZ39	1537200	50	46692	40.05	96.05	1.32	Archaea	Methanobacteriota	Thermococci	Thermococcales	Thermococcaceae	Thermococcus	Thermococcus sp001317345
Thermocrinis_minervae_CK131	1663680	102	23118	38.85	91.55	0.00	Bacteria	Aquificota	Aquificae	Aquificales	Aquificaceae	Thermocrinis	Thermocrinis minervae
Thermodesulfovibrio_sp_GURE2	1923374	62	47555	32.84	97.18	1.41	Bacteria	Nitrospirota	Thermodesulfovibrionia	Thermodesulfovibrionales	Thermodesulfovibrionaceae	Thermodesulfovibrio	Thermodesulfovibrio sp001707915
Thermodesulfovibrio_yellowstonii_CK101	1845029	34	84044	35.71	95.77	1.41	Bacteria	Nitrospirota	Thermodesulfovibrionia	Thermodesulfovibrionales	Thermodesulfovibrionaceae	Thermodesulfovibrio	Thermodesulfovibrio yellowstonii
Thermoflexus_hugenholtzii_HID14	380858	80	4974	49.54	0.00	0.00	Bacteria	Chloroflexota	Anaerolineae	Thermoflexales	Thermoflexaceae	Thermoflexus	Thermoflexus hugenholtzii
Thermoflexus_sp_HID2	2768883	470	6371	63.41	84.51	1.41	Bacteria	Chloroflexota	Anaerolineae	Thermoflexales	Thermoflexaceae	Thermoflexus	Thermoflexus sp002898735
Thermoflexus_sp_HID4	1690257	335	5387	67.52	80.28	0.00	Bacteria	Chloroflexota	Anaerolineae	Thermoflexales	Thermoflexaceae	Thermoflexus	Thermoflexus sp002898735
Thermonema_rossianum_KST2	1993396	1028	2029	48.32	83.10	7.04	Bacteria	Bacteroidota	Bacteroidia	Cytophagales	Thermonemataceae	Thermonema	Thermonema rossianum
Thermus_sp_CK1	2395327	366	11275	64.96	87.32	9.86	Bacteria	Deinococcota	Deinococci	Deinococcales	Thermaceae	Thermus
Thermus_sp_TUZ9	1658800	533	3803	64.60	84.51	1.41	Bacteria	Deinococcota	Deinococci	Deinococcales	Thermaceae	Thermus
Thiobacillaceae_NEB90	1860372	273	8373	63.79	88.73	1.41	Bacteria	Proteobacteria	Gammaproteobacteria	Burkholderiales	Thiobacillaceae
Thiobacillus_sp_GURE1	2704869	100	41874	67.04	97.18	1.41	Bacteria	Proteobacteria	Gammaproteobacteria	Burkholderiales	Thiobacillaceae	Thiobacillus
Thiomonas_sp_CK15	2592903	242	13648	65.22	92.96	4.23	Bacteria	Proteobacteria	Gammaproteobacteria	Burkholderiales	Burkholderiaceae	Thiomonas
UBA11096_sp_CK26	671747	75	12203	43.04	63.38	2.82	Bacteria	Aquificota	Aquificae	Aquificales	Aquificaceae	UBA11096	UBA11096 sp003534055
UBA11096_sp_HIDGURE	726734	101	8857	43.46	61.97	0.00	Bacteria	Aquificota	Aquificae	Aquificales	Aquificaceae	UBA11096	UBA11096 sp003534055
UBA12178_sp_TUZ12	1326744	579	2575	53.25	74.65	2.82	Bacteria	Thermotogota	Thermotogae	UBA12178	UBA12178	UBA12178
UBA3361_sp_CK76	2298095	810	3423	67.01	85.92	2.82	Bacteria	Proteobacteria	Gammaproteobacteria	Burkholderiales	Thiobacillaceae	UBA3361	UBA3361 sp002360535
UBA3571_TUZ_KST_1	875491	314	3274	61.94	0.00	0.00	Bacteria	Bipolaricaulota	Bipolaricaulia	Bipolaricaulales	Bipolaricaulaceae	UBA3571	UBA3571 sp002375995
UBA9862_sp_CK61	2119855	154	23185	48.82	84.51	1.41	Bacteria	Firmicutes	Dethiobacteria	DTU022	UBA8154	UBA9862	UBA9862 sp003444595
UBA9935_ENT99	1514390	262	6539	42.68	87.32	0.00	Bacteria	Nitrospirota	Thermodesulfovibrionia	Thermodesulfovibrionales	UBA9935
Unknown1_TUZ	1793781	550	3934	66.77	92.96	9.86
Unknown3_CK3	2546394	70	68593	32.12	100.00	0.00
Unknown_CAN_ENT	987688	447	2484	44.11	74.65	15.49
Unknown_CK09	1495287	474	4108	62.62	92.96	8.45
Unknown_CK100	2403728	489	5181	62.92	74.65	5.63
Unknown_CK140	2137166	127	25177	39.36	92.96	0.00
Unknown_CK2020	580822	189	3707	27.95	73.24	1.41
Unknown_CK5	2488986	74	53661	67.80	100.00	5.63
Unknown_CK52	2466952	271	12431	32.22	90.14	5.63
Unknown_CK77	3180806	129	59243	31.89	95.77	7.04
Unknown_CK82	2068330	750	3377	45.04	90.14	8.45
Unknown_CK92	2104280	567	4621	57.80	90.14	5.63
Unknown_CK_SIPLIGHT	599990	370	1676	52.79	56.58	3.95
Unknown_ENT09	1377566	216	7157	53.72	81.69	4.23
Unknown_ENT15	2269103	164	19906	40.55	91.55	2.82
Unknown_ENTUR4	3640879	131	40961	63.97	92.96	1.41
Unknown_ENT_GURE22	1319659	202	7902	37.94	74.65	0.00
Unknown_GURE89	1794133	662	3165	62.52	78.87	1.41
Unknown_HID62	1000518	216	4609	28.24	53.95	0.00
Unknown_HID72	873569	63	34324	55.60	78.95	1.32
Unknown_HID73	677793	381	1826	28.61	66.20	5.63
Unknown_IVR32	2730349	1045	3078	35.27	88.73	1.41
Unknown_KST20	2538747	58	88688	60.97	97.18	0.00
Unknown_NEB_KAZ3	1611551	626	3030	54.08	76.06	1.41
Unknown_NEB_TUZ77	1156039	740	1524	30.36	47.89	2.82
Unknown_TUZ101	4646960	475	12586	60.90	92.96	0.00
Unknown_TUZ129	1520317	120	16885	65.66	85.92	1.41
Unknown_TUZ21	1871599	113	29612	33.38	73.24	15.49
Unknown_TUZ25	1918735	35	93527	40.53	88.73	0.00
Unknown_TUZ45	2147182	180	16345	43.02	94.37	1.41
Unknown_TUZ48	1575974	28	101530	40.04	84.21	0.00
Unknown_TUZ67	3392231	396	10757	64.33	91.55	4.23
Unknown_TUZ888	503280	333	1499	54.77	42.25	0.00
Unknown_TUZ92	2185520	346	7699	65.10	80.28	2.82
Unknown_TUZ_KST	2616019	813	4061	60.87	90.14	8.45
Unknown_TUZ_KST10	1838293	68	39915	43.77	90.14	2.82
Unknown_TUZ_KST144	546420	73	9297	29.74	77.63	2.63
Unknown_TUZ_KST24	1195877	39	71717	34.81	98.68	3.95
Unknown_TUZ_KST36	739213	74	15123	31.97	80.28	0.00
Unknown_TUZ_KST73	1246891	302	4298	69.50	53.52	1.41
Unknown_TUZ_KST78	1774027	101	25276	69.11	94.37	2.82
Unknown_TUZ_KST91	3014740	329	11582	45.26	86.84	2.63
Unknown_TUZ_KST93	2683308	82	52105	61.58	95.77	0.00
Unknown_TUZ_KST_2	1400746	435	4515	60.11	0.00	0.00
WYZ-LMO6_sp_CK105	1032973	292	4603	64.02	92.11	5.26	Archaea	Hadarchaeota	Hadarchaeia	Hadarchaeales	WYZ-LMO6	WYZ-LMO6	WYZ-LMO6 sp004347925
Zestosphaera_tikiterensis_HID13	1417081	32	82675	39.71	89.47	0.00	Archaea	Thermoproteota	Thermoproteia	Desulfurococcales	NBVN01	Zestosphaera	Zestosphaera tikiterensis

## Sheet: Relative abundances of bins 
Bins	Kestanbol (Filtered fluid)	Tuzla (sediment)	Tuzla (Filtered fluid)	Can (Filtered fluid)	Bardakcilar (750 meters)	Gure (250 meters)	Gure (1390 meters)	Entur (Filtered fluid)	Hidirlar (Filtered fluid)	Hidirlar (sediment)	Nebiler (Filtered fluid)	BuyukIlica (Filtered fluid)	Experimental data (Data not published)
Ca Bipolaricaulota CK101	0.000	0.000	0.000	0.000	7.546	0.000	0.000	2.984	0.000	0.000	2.017	0.000	87.453
Ca Bipolaricaulota CK84	0.000	0.000	0.000	0.000	12.583	0.000	0.000	87.387	0.000	0.000	0.014	0.000	0.017
Ca Bipolaricaulota HID15	0.000	0.000	0.000	0.000	0.001	0.000	0.000	0.000	0.000	46.070	0.000	0.000	53.929
Ca Bipolaricaulota TUZ33	0.000	96.026	3.972	0.000	0.000	0.000	0.000	0.000	0.000	0.000	0.000	0.000	0.002
AG1 sp. HID134	0.000	0.000	0.000	0.000	0.000	0.000	0.000	0.000	46.958	45.458	0.000	0.005	7.580
Archaeoglobaceae HID16	0.000	0.000	0.000	0.000	0.000	0.000	0.000	0.000	0.000	99.409	0.000	0.000	0.591
Archaeoglobus sp. KST TUZ	7.930	88.849	3.202	0.000	0.000	0.000	0.000	0.000	0.000	0.000	0.000	0.000	0.019
Archaeoglobus sp. TUZ KST11	48.880	27.435	16.301	0.000	0.000	0.000	0.000	0.000	0.000	0.000	0.000	0.000	7.384
Ardenticatena maritima TUZ2	19.778	0.007	79.950	0.000	0.000	0.000	0.000	0.000	0.000	0.000	0.000	0.000	0.266
B63 sp. HID133	0.000	0.000	0.000	0.000	0.000	0.000	0.000	0.000	0.000	99.984	0.000	0.000	0.016
B73-G16 sp. HID112	0.000	0.000	0.000	0.000	0.000	0.000	0.000	0.000	0.000	98.838	0.000	0.000	1.162
BMS3ABIN06 sp. ENTUR	0.000	0.000	0.000	0.000	0.000	0.000	0.000	100.000	0.000	0.000	0.000	0.000	0.000
Bacteroidia CK103	0.104	0.002	0.000	0.000	0.488	0.000	0.000	0.011	0.000	0.000	7.010	0.000	92.386
Bellilinea sp. GURE3	0.000	0.000	0.000	0.006	0.001	0.000	97.400	0.000	0.000	0.000	0.000	0.002	2.591
Burkholderiales CK29	0.000	0.000	0.000	0.000	0.718	0.780	0.001	1.540	0.000	0.000	0.882	0.000	96.078
Burkholderiales GURE21	0.000	0.000	0.000	0.000	0.016	0.000	98.951	0.001	0.000	0.000	1.028	0.000	0.004
Caldarchaeum subterraneum HID5	0.000	0.000	0.000	0.000	0.000	0.000	0.000	0.000	2.977	88.667	0.000	0.000	8.356
Caldimicrobium sp. HID99	0.000	0.000	0.000	0.000	0.031	0.000	0.000	0.016	2.809	56.497	0.000	0.000	40.648
Chloroflexus aurantiacus CK9	0.000	0.000	0.000	0.000	54.173	0.000	1.076	0.005	0.000	0.000	36.423	0.000	8.323
Chloroflexus sp. NEB1	0.000	0.000	0.000	0.000	0.000	0.000	0.199	0.000	0.000	0.000	99.801	0.000	0.000
Chlorogloeopsis sp. CK12	0.000	0.000	0.000	0.000	0.000	0.000	7.516	0.000	0.000	0.000	92.484	0.000	0.000
Cyclobacteriaceae CK80	0.000	0.000	0.000	0.000	0.000	0.000	0.795	0.006	0.000	0.000	1.557	0.000	97.642
Desulfurococcaceae HID21	0.000	0.000	0.000	0.000	0.000	0.000	0.000	0.000	0.000	100.000	0.000	0.000	0.000
ELB16-189 sp. CAN1	0.000	0.000	0.000	100.000	0.000	0.000	0.000	0.000	0.000	0.000	0.000	0.000	0.000
Fischerella thermalis IVR1	0.000	0.000	0.000	0.000	0.000	0.000	0.005	0.000	0.000	0.000	0.031	99.964	0.000
Fontimonas thermophila	0.021	0.000	0.000	0.000	0.000	0.434	0.000	0.032	0.000	0.000	0.001	0.000	99.512
Fontimonas thermophila CK2	0.000	0.000	0.000	0.000	0.000	0.000	0.000	0.005	0.000	0.000	0.000	0.000	99.995
G233 sp. CK24	0.001	0.002	0.000	0.000	0.054	0.001	6.938	0.169	0.000	0.000	0.021	0.000	92.806
GBS-DC sp. CK98	0.000	0.000	0.000	0.000	57.460	0.019	0.000	0.086	3.451	1.285	0.000	0.000	37.699
GBS-DC sp. HID6	0.000	0.000	0.000	0.000	0.100	0.000	0.000	0.005	70.305	29.182	0.002	0.001	0.405
GCA-2687515 sp. NEB2	0.000	0.000	0.000	0.000	2.015	0.000	0.215	1.023	0.000	0.001	96.490	0.000	0.256
GJ E10 sp.900290295	0.001	0.000	0.000	0.000	0.000	0.000	0.000	0.000	0.000	0.000	0.000	0.000	99.999
G 28-57-27 sp. GURE5	0.000	0.002	0.001	0.000	0.000	99.614	0.029	0.001	0.000	0.000	0.028	0.272	0.054
Gallionellaceae IVR2	0.001	0.000	0.000	0.003	0.010	0.306	0.110	0.012	0.000	0.000	0.263	99.167	0.127
HRBIN02 sp. HID11	0.000	0.000	0.000	0.000	0.000	0.000	0.000	0.000	0.090	70.173	0.000	0.000	29.737
HRBIN17 sp. HID43	0.000	0.000	0.000	0.000	0.000	0.000	0.000	0.000	27.630	40.765	0.000	0.000	31.605
HRBIN29 sp. TUZ KST38	13.177	71.432	1.147	0.000	0.000	0.000	0.000	0.010	0.000	0.000	0.000	0.000	14.234
HRBIN37 sp. TUZ1	14.064	72.019	5.306	0.000	0.000	0.000	0.000	0.000	0.000	0.000	0.000	0.000	8.611
HRBIN39 sp. KST3	33.862	1.591	0.190	0.000	0.000	0.000	0.000	0.000	0.000	0.000	0.005	0.000	64.351
HRBIN40 sp. KST7	18.133	0.000	0.000	0.000	0.000	0.000	0.000	0.000	0.000	0.000	0.000	0.000	81.867
Hydrogenobacter thermophilus HID30	0.000	0.000	0.000	0.000	0.000	0.000	0.000	0.000	90.818	9.019	0.000	0.004	0.159
Hydrogenophilus thermoluteolus CK7	39.350	0.089	3.134	0.000	0.000	0.000	0.000	0.000	0.000	0.000	0.000	0.000	57.427
Hydrothermus pacificus TUZ12	0.103	97.242	2.655	0.000	0.000	0.000	0.000	0.000	0.000	0.000	0.000	0.000	0.000
JDFR-14 sp. TUZ19	0.000	1.636	98.364	0.000	0.000	0.000	0.000	0.000	0.000	0.000	0.000	0.000	0.000
JdFR-37 sp. TUZ8	0.035	35.162	64.795	0.000	0.000	0.000	0.000	0.000	0.000	0.000	0.000	0.000	0.008
JdFR-43 sp. TUZ25	0.000	100.000	0.000	0.000	0.000	0.000	0.000	0.000	0.000	0.000	0.000	0.000	0.000
Korarchaeum sp. HID24	0.000	0.000	0.000	0.000	0.000	0.000	0.000	0.000	0.000	56.466	0.000	0.000	43.534
Kryptonium sp. HID1	0.000	0.000	0.000	0.000	0.000	0.000	0.000	0.000	0.000	99.672	0.000	0.000	0.328
LSR1 sp. CK120	0.000	0.000	0.000	0.001	35.530	0.039	0.000	0.001	0.000	0.000	0.011	0.000	64.418
Lysobacter tengchongense sp. ENT1	0.000	0.000	0.000	0.030	0.001	0.108	99.575	0.000	0.000	0.000	0.047	0.000	0.240
Meinhardsimonia xiamenensis KST1	99.959	0.000	0.013	0.000	0.000	0.000	0.000	0.000	0.000	0.000	0.000	0.000	0.028
Meiothermus cerbereus CK14	0.000	0.000	0.000	0.000	0.180	0.000	0.003	0.011	0.000	0.000	0.041	0.000	99.765
Meiothermus hypogaeus CK21	0.000	0.000	0.000	0.000	78.082	0.002	0.000	0.003	0.000	0.000	0.000	0.000	21.913
Meiothermus ruber CK4	0.000	0.000	0.000	0.000	0.631	0.000	1.077	0.000	0.000	0.000	0.213	0.000	98.079
Meiothermus sp. CK108	0.000	0.000	0.000	0.000	1.601	0.001	2.208	0.003	0.000	0.000	1.600	0.000	94.283
Meiothermus sp. CK23	0.000	0.000	0.000	0.000	0.057	0.000	28.069	0.000	0.000	0.009	29.094	0.000	42.771
Methylohalobius crimeensis NEB10	0.000	0.000	0.000	0.000	5.070	0.000	0.020	0.311	0.000	0.000	94.600	0.000	0.000
Methylohalobius crimeensis TUZ KEST51	53.054	0.000	9.435	0.000	0.000	0.000	0.000	0.000	0.000	0.000	0.000	0.000	37.511
Micrococcus luteus CK11	0.003	0.000	0.000	0.000	0.000	0.000	0.000	0.000	0.000	0.000	0.000	0.000	99.997
Moraxella sp. CK7	0.000	0.000	0.000	0.000	0.000	0.000	0.000	0.000	0.000	0.000	0.000	0.000	100.000
Nitrosocaldus cavascurensis HID10	0.000	0.000	0.000	0.000	0.000	0.000	0.000	0.000	0.003	99.940	0.000	0.000	0.057
PFJX01 sp. IVR4	0.000	0.000	0.000	0.048	0.288	0.121	0.163	0.041	0.000	0.002	0.578	98.621	0.139
Porphyrobacter cryptus CK5	0.000	0.000	0.000	0.136	0.000	0.001	0.003	0.025	0.000	0.000	0.000	0.000	99.836
QEVD01 sp. TUZ27	0.000	99.184	0.807	0.000	0.000	0.000	0.000	0.000	0.000	0.000	0.000	0.000	0.009
Rhodobacteraceae KST5	99.988	0.000	0.006	0.000	0.000	0.000	0.000	0.000	0.000	0.000	0.000	0.000	0.006
Rhodothermus sp. CK13	1.188	33.520	35.526	0.000	0.015	0.000	0.000	0.000	0.000	0.000	0.000	0.000	29.751
SG8-39 NEB2	0.000	0.000	0.000	0.000	54.221	0.000	0.199	40.180	0.000	0.000	5.399	0.000	0.001
SURF-21 sp. GURE9	0.000	0.011	0.000	0.000	0.000	99.989	0.000	0.000	0.000	0.000	0.000	0.000	0.000
Schleiferia thermophila CK8	0.000	0.000	0.000	0.000	0.000	0.000	0.014	1.238	0.000	0.000	0.010	0.000	98.737
Sediminibacterium sp. GURE4	0.000	0.000	0.000	0.000	0.000	0.002	99.991	0.003	0.000	0.005	0.000	0.000	0.000
Sulfurihydrogenibium azorense CK17	0.005	0.000	0.000	0.000	3.629	0.000	0.000	0.000	0.000	0.000	0.000	0.000	0.000
Tepidimonas ignava CK19	0.000	0.000	0.000	0.000	0.007	0.001	0.196	0.080	0.000	0.000	0.000	0.000	99.715
Tepidimonas ignava CK22	0.000	0.000	0.000	0.000	0.001	0.006	0.007	0.000	0.000	0.000	0.000	0.000	99.986
Tepidimonas sp. CK10	0.000	0.000	0.000	0.000	0.767	0.010	1.921	0.647	0.000	0.000	0.005	0.000	96.649
Tepidimonas sp. CK20	0.000	0.000	0.000	0.000	0.001	0.000	2.425	0.385	0.000	0.000	0.000	0.000	97.189
Thermanaeromonas toyohensis sp. GURE5	0.000	0.000	0.000	0.000	0.000	0.925	86.782	0.005	0.000	0.000	0.000	0.000	12.288
Thermococcus sp. TUZ39	0.004	61.196	38.800	0.000	0.000	0.000	0.000	0.000	0.000	0.000	0.000	0.000	0.000
Thermocrinis minervae CK131	0.000	0.000	0.000	0.000	79.121	0.000	0.000	0.000	0.000	0.000	0.000	0.000	20.879
Thermodesulfovibrio sp. GURE2	0.000	0.000	0.000	0.000	0.000	41.476	55.355	3.168	0.000	0.000	0.000	0.000	0.000
Thermodesulfovibrio yellowstonii CK101	0.000	0.000	0.000	0.000	10.788	9.401	0.000	0.000	0.000	0.018	0.000	0.000	79.793
Thermoflexus hugenholtzii HID14	0.000	0.000	0.000	0.000	0.000	0.000	0.000	0.000	12.095	66.572	0.000	0.000	21.333
Thermoflexus sp. HID2	0.000	0.000	0.000	0.000	0.000	0.000	0.000	0.000	0.028	47.009	0.000	0.000	52.963
Thermoflexus sp. HID4	0.000	0.000	0.000	0.000	0.000	0.000	0.000	0.000	4.459	85.584	0.000	0.000	9.958
Thermonema rossianum KST2	86.933	0.000	0.696	0.000	0.000	0.000	0.000	0.000	0.000	0.000	0.000	0.000	12.370
Thermus sp. CK1	0.000	0.025	0.221	0.000	2.566	0.831	3.831	0.000	0.885	0.384	0.000	0.000	87.916
Thermus sp. TUZ9	0.000	9.130	88.162	0.000	0.000	0.005	0.332	0.000	0.957	1.132	0.000	0.000	0.282
Thiobacillaceae NEB90	0.000	0.000	0.000	0.000	0.050	0.005	0.763	0.004	0.000	0.000	99.125	0.000	0.053
Thiobacillus sp. GURE1	0.000	0.000	0.000	0.000	0.000	1.769	98.227	0.000	0.000	0.000	0.000	0.000	0.003
Thiomonas sp. CK15	0.000	0.000	0.000	0.000	0.000	99.993	0.000	0.000	0.000	0.000	0.000	0.006	0.000
UBA11096 sp. CK26	0.000	0.000	0.000	0.000	37.993	0.079	0.262	0.000	0.140	0.533	0.000	0.000	60.992
UBA11096 sp. HIDGURE	0.000	0.000	0.000	0.000	0.068	3.693	14.213	0.000	45.211	9.991	0.000	0.000	26.824
UBA12178 sp. TUZ12	0.000	94.853	5.147	0.000	0.000	0.000	0.000	0.000	0.000	0.000	0.000	0.000	0.000
UBA3361 sp. CK76	0.000	0.000	0.000	0.000	66.063	0.078	0.001	6.234	0.000	0.000	0.084	0.000	27.538
UBA3571 TUZ KST 1	0.187	96.316	3.401	0.000	0.000	0.008	0.000	0.000	0.000	0.000	0.000	0.000	0.087
UBA9862 sp. CK61	0.000	0.000	0.000	0.000	0.022	0.016	0.000	0.000	0.000	0.000	0.000	0.000	99.962
UBA9935 ENT99	0.000	0.000	0.000	0.000	0.000	1.502	0.000	98.496	0.000	0.000	0.001	0.001	0.000
Unknown1 TUZ	0.015	99.078	0.905	0.000	0.000	0.000	0.000	0.000	0.000	0.000	0.000	0.000	0.002
Unknown3 CK3	0.000	0.000	0.000	0.000	0.308	0.000	0.000	0.000	0.000	0.000	16.052	0.000	83.640
Unknown CAN ENT	0.000	0.000	0.000	0.000	0.000	0.003	0.000	99.997	0.000	0.000	0.000	0.000	0.000
Unknown CK09	0.000	0.000	0.000	0.000	12.109	1.451	0.000	1.932	0.000	0.429	0.000	0.000	84.048
Unknown CK100	0.000	0.000	0.000	0.000	24.074	3.558	0.000	0.005	0.001	6.918	0.000	0.000	65.444
Unknown CK140	0.000	0.000	0.000	0.003	35.628	0.004	0.000	0.114	0.000	0.000	0.000	0.000	63.949
Unknown CK2020	0.000	0.000	0.000	0.000	30.820	0.000	0.000	0.008	0.557	0.417	0.001	0.000	68.197
Unknown CK5	21.055	0.014	7.799	0.000	0.000	0.000	0.000	0.000	0.000	0.000	0.000	0.000	71.132
Unknown CK52	0.000	0.001	0.000	0.000	0.535	0.000	0.000	0.026	0.000	0.000	0.000	0.000	99.439
Unknown CK77	0.000	0.000	0.000	0.000	0.007	0.000	0.000	0.001	0.000	0.000	0.000	0.000	99.992
Unknown CK82	0.000	0.000	0.000	0.000	4.946	1.200	0.000	0.176	0.000	0.000	0.000	0.001	93.677
Unknown CK92	0.000	0.000	0.000	0.000	99.851	0.000	0.000	0.000	0.000	0.001	0.000	0.000	0.149
Unknown CK SIPLIGHT	0.000	0.000	0.000	2.185	58.687	0.987	0.000	0.039	0.000	0.000	0.709	0.000	37.128
Unknown ENT09	0.000	0.000	0.000	0.000	0.000	0.000	0.000	100.000	0.000	0.000	0.000	0.000	0.000
Unknown ENT15	0.000	0.000	0.000	0.000	0.000	0.007	0.000	99.993	0.000	0.000	0.000	0.000	0.000
Unknown ENTUR4	0.000	0.000	0.000	0.000	0.000	0.000	0.000	100.000	0.000	0.000	0.000	0.000	0.000
Unknown ENT GURE22	0.000	0.000	0.000	0.000	0.000	1.612	0.000	98.388	0.000	0.000	0.000	0.000	0.000
Unknown GURE89	0.000	0.000	0.000	0.000	0.000	25.915	73.928	0.000	0.000	0.000	0.000	0.000	0.157
Unknown HID62	0.000	0.000	0.000	0.000	0.000	0.000	0.000	0.000	0.000	100.000	0.000	0.000	0.000
Unknown HID72	0.000	0.000	0.000	0.000	0.000	0.033	0.019	0.000	0.000	99.947	0.000	0.000	0.001
Unknown HID73	0.010	0.000	0.000	0.029	0.000	0.000	0.000	0.000	56.290	43.630	0.037	0.000	0.004
Unknown IVR32	0.000	0.000	0.000	0.000	0.000	0.000	0.000	0.002	0.000	0.001	0.006	99.991	0.000
Unknown KST20	99.561	0.000	0.380	0.000	0.000	0.000	0.000	0.000	0.000	0.000	0.000	0.000	0.059
Unknown NEB KAZ3	0.000	0.000	0.000	0.000	82.699	0.000	0.010	0.000	0.000	0.000	17.278	0.000	0.013
Unknown NEB TUZ77	0.003	0.000	0.593	0.000	0.098	1.036	0.380	0.000	0.000	0.000	97.686	0.001	0.203
Unknown TUZ101	0.000	99.991	0.009	0.000	0.000	0.000	0.000	0.000	0.000	0.000	0.000	0.000	0.000
Unknown TUZ129	0.000	97.944	2.056	0.000	0.000	0.000	0.000	0.000	0.000	0.000	0.000	0.000	0.000
Unknown TUZ21	0.043	95.128	4.749	0.000	0.074	0.000	0.000	0.000	0.000	0.003	0.000	0.000	0.004
Unknown TUZ25	0.012	98.659	1.329	0.000	0.000	0.000	0.000	0.000	0.000	0.000	0.000	0.000	0.000
Unknown TUZ45	0.000	98.812	1.188	0.000	0.000	0.000	0.000	0.000	0.000	0.000	0.000	0.000	0.000
Unknown TUZ48	0.000	2.651	97.349	0.000	0.000	0.000	0.000	0.000	0.000	0.000	0.000	0.000	0.000
Unknown TUZ67	0.063	93.681	6.253	0.000	0.000	0.000	0.000	0.000	0.000	0.000	0.000	0.000	0.003
Unknown TUZ888	0.000	96.463	3.537	0.000	0.000	0.000	0.000	0.000	0.000	0.000	0.000	0.000	0.000
Unknown TUZ92	0.000	99.408	0.591	0.000	0.000	0.000	0.000	0.000	0.000	0.000	0.000	0.000	0.001
Unknown TUZ KST	21.417	65.254	9.695	0.000	0.000	0.000	0.000	0.000	0.000	0.000	0.000	0.000	3.634
Unknown TUZ KST10	6.525	86.799	6.677	0.000	0.000	0.000	0.000	0.000	0.000	0.000	0.000	0.000	0.000
Unknown TUZ KST144	74.807	16.018	0.013	0.000	0.000	0.000	0.000	0.000	0.000	0.000	0.000	0.000	9.163
Unknown TUZ KST24	22.543	61.333	9.642	0.000	0.000	0.000	0.000	0.000	0.000	0.000	0.000	0.000	6.481
Unknown TUZ KST36	9.924	26.361	63.581	0.000	0.000	0.000	0.000	0.000	0.000	0.000	0.000	0.000	0.135
Unknown TUZ KST73	58.066	0.014	0.793	0.009	0.000	0.000	0.000	0.000	0.000	0.000	0.000	0.000	41.118
Unknown TUZ KST78	16.788	0.000	4.114	0.000	0.000	0.000	0.000	0.000	0.000	0.000	0.000	0.000	79.098
Unknown TUZ KST91	0.013	65.005	34.982	0.000	0.000	0.000	0.000	0.000	0.000	0.000	0.000	0.000	0.000
Unknown TUZ KST93	7.522	41.335	48.725	0.000	0.000	0.000	0.000	0.000	0.000	0.000	0.000	0.000	2.419
Unknown TUZ KST 2	2.990	56.384	29.666	0.000	0.000	0.000	0.000	0.000	0.000	0.000	0.000	0.000	10.959
WYZ-LMO6 sp. CK105	0.000	0.000	0.000	0.000	43.217	1.841	0.000	0.000	0.000	0.415	0.000	0.000	54.526
Zestosphaera tikiterensis HID13	0.000	0.000	0.000	0.000	0.000	0.000	0.000	0.000	0.000	95.939	0.000	0.000	4.061

## Sheet: Bin recruitment
Bin recruitment per samples generated by anvi'o v7.
MAGs	Gure250Meters2021	Kestanbol_T0_Filtered	Tuzla_T0_Sediment	Tuzla_T0_Filtered	Can_T0_Filtered	KazMountain_Filtered_750meters	Gure250_T0_Filtered	Gure1390_T0_Deep_well_Filtered	Entur_T0_Filtered	Hidirlar_T0_Filtered	Hidirlar_T0_Sediment	Nebiler_T0_filtered	BuyukIlica_T0_filtered	Experimental data (Data not published)
Unknown_CK84	0.0	0.0	0.0	0.0	0.0	0.4	0.0	0.0	2.6	0.0	0.0	0.0	0.0	0.0
Unknown_CK101	0.0	0.0	0.0	0.0	0.0	0.3	0.0	0.0	0.2	0.0	0.0	0.2	0.0	0.5
UBA3571_sp_HID15	0.0	0.0	0.0	0.0	0.0	0.0	0.0	0.0	0.0	0.0	2.2	0.0	0.0	0.3
Unknown_TUZ33	0.0	0.0	10.4	0.4	0.0	0.0	0.0	0.0	0.0	0.0	0.0	0.0	0.0	0.0
Other MAGs	65.1	39.6	50.0	25.8	19.8	58.8	65.1	61.2	38.6	72.1	56.1	43.4	92.8	60.1
Contig not binned	34.8	60.4	39.6	73.8	80.2	40.5	34.8	38.8	58.6	26.4	40.8	56.5	7.1	39.0
